1 ORIGINAL ARTICLE:

2 **Multi-centre post-implementation evaluation of SARS-CoV-2 antigen-based point of**  
3 **care tests used for asymptomatic screening of continuing care healthcare workers**

4  
5 Jamil N Kanji<sup>a-d,\*</sup>, Dustin T Proctor<sup>d,e</sup>, William Stokes<sup>b,c,f</sup>, Byron M Berenger<sup>b,d</sup>, James  
6 Silvius<sup>g</sup>, Graham Tipples<sup>b,h,i</sup>, A Mark Joffe<sup>f,j</sup>, Allison A Venner<sup>d,e</sup>

7  
8 Affiliations:

- 9  
10 a. Division of Infectious Diseases, Department of Medicine, University of Calgary  
11 School of Medicine, 3030 Hospital Drive NW, Calgary, AB, Canada, T2N 4W4  
12  
13 b. Public Health Laboratory, Alberta Precision Laboratories, Alberta, Canada  
14  
15 c. Department of Laboratory Medicine and Pathology, Faculty of Medicine and  
16 Dentistry, University of Alberta, 8440 – 112 Street NW, Edmonton, AB, Canada,  
17 T6G 2B7  
18  
19 d. Department of Pathology and Laboratory Medicine, University of Calgary School of  
20 Medicine, 3535 Research Road NW, Calgary, AB, Canada, T2L 2K8  
21  
22 e. Clinical Biochemistry, Alberta Precision Laboratories, Diagnostic and Scientific  
23 Center, 3535 Research Road NW, Calgary, AB, T2L 2K8  
24  
25 f. Division of Infectious Diseases, Department of Medicine, University of Alberta, 8440  
26 – 112 Street NW, Edmonton, AB, Canada, T6G 2B7  
27  
28  
29 g. Division of Geriatric Medicine, Cumming School of Medicine, 3030 Hospital Drive  
30 NW, Calgary, AB, Canada, T2N 4W4  
31  
32 h. Li Ka Shing Institute of Virology, 6-010 Katz Group Center for Pharmacy and Health  
33 Research, University of Alberta, Edmonton, AB, Canada, T6G 2E1  
34  
35 i. Department of Medical Microbiology and Immunology, Faculty of Medicine and  
36 Dentistry, University of Alberta, 8440 – 112 Street NW, Edmonton, AB, Canada,  
37 T6G 2B7  
38  
39 j. Alberta Health Services, Seventh Street Plaza, 14<sup>th</sup> floor-North Tower, 10030 – 107  
40 Street NW, Edmonton, AB, Canada, T5J 3E4  
41

42 \*Corresponding author:

43 Jamil N. Kanji, MD, DTM&H, FRCPC  
44 Public Health Laboratory, Alberta Precision Laboratories  
45 3030 Hospital Drive NW, Calgary, AB, Canada T2N 4W4  
46 Phone: +1 403 944 1207; Fax: +1 403 283 0142  
47 Email: [jamil.kanji@albertahealthservices.ca](mailto:jamil.kanji@albertahealthservices.ca)  
48

49 Word count (main manuscript): 2082

50

51 Abstract word count: 209

52

53 **Abstract**

54

55 **OBJECTIVES**

56 Frequent screening of SARS-CoV-2 among asymptomatic populations using antigen-based  
57 point of care tests (APOCT) is occurring globally with limited clinical performance data.  
58 The positive predictive value (PPV) of two APOCT used in the asymptomatic screening of  
59 SARS-CoV-2 among healthcare workers (HCW) at continuing care (CC) sites across Alberta,  
60 Canada was evaluated.

61 **METHODS**

62 Between February 22 and May 2, 2021, CC sites implemented SARS-CoV-2 voluntary  
63 screening of their asymptomatic HCW. Onsite testing with Abbott Panbio or BD Veritor  
64 occurred on a weekly or twice weekly basis. Positive APOCT were confirmed with a real-  
65 time reverse-transcriptase polymerase chain reaction (rRT-PCR) reference method.

66 **RESULTS**

67 A total of 71,847 APOCT (17,689 Veritor and 54,158 Panbio) were performed among 369  
68 CC sites. Eighty-seven (0.12%) APOCT were positive, of which 39 (0.05%) confirmed as  
69 true positives using rRT-PCR. Use of the Veritor and Panbio resulted in a 76.6% and 30.0%  
70 false positive detection, respectively ( $p < 0.001$ ). This corresponded to a 23.4% and 70.0%  
71 PPV for the Veritor and Panbio, respectively.

72 **CONCLUSIONS**

73 Frequent screening of SARS-CoV-2 among asymptomatic HCW in CC, using APOCT,  
74 resulted in a very low detection rate and a high detection of false positives. Careful  
75 assessment between the risks vs benefits of APOCT programs in this population needs to be  
76 thoroughly considered before implementation.

77

78 Key words: point-of-care, SARS-CoV-2 antigen, positive predictive value, sensitivity

79 **Introduction**

80

81

82 Point of Care Testing (POCT), and specifically antigen-based point of care tests (APOCT),  
83 represent an important public health measure in managing SARS-CoV-2 transmissions when  
84 used appropriately and with acknowledgement of their shortcomings. APOCT is particularly  
85 useful in identifying and isolating SARS-CoV-2 positive cases in symptomatic individuals in  
86 high-risk settings, such as congregate housing and care facilities or in areas where longer  
87 turn-around-times (TAT) of more sensitive nucleic acid testing may compromise containment  
88 of transmission. Governments around the world have been quick to support the widescale  
89 implementation of APOCT programs [1].

90

91 Rapid and wide-scale deployment of APOCT has been promoted despite limited data  
92 regarding the analytical and clinical performance of these devices in the various settings in  
93 which they have been used. POCT programs that include APOCT have been criticised for the  
94 poor sensitivity of these tests compared to PCR tests, particularly in asymptomatic  
95 individuals [2]. However, there has been intense interest in testing asymptomatic individuals  
96 from a public health perspective, as some estimate that 30 to 40 percent of infectious  
97 individuals are asymptomatic. Rapid identification and isolation of these individuals is  
98 viewed as highly effective in breaking chains of transmission [1, 3-5]. However, there is  
99 concern that APOCT may demonstrate poor specificity when used for the surveillance of  
100 asymptomatic individuals, with reports citing up to 60% false positive rates [6, 7].

101

102 Routine serial testing of asymptomatic staff in continuing care facilities using APOCT has  
103 been implemented as a purportedly important public health measure for early case  
104 identification, and prevention of SARS-CoV-2 outbreaks among vulnerable residents [1, 3-5].

105 While APOCT may represent an important tool in limiting transmission in congregate  
106 settings, the negative impacts of a false positive result for staff and the site needs to be  
107 considered and further data on the clinical performance of APOCT in continuing care  
108 facilities is required.

109

110 Our aim was to evaluate the positive predictive value (PPV) of two APOCT (Abbott  
111 Panbio™ and BD Veritor™) in a largescale multicenter implementation of asymptomatic  
112 SARS-CoV-2 testing of healthcare workers (HCWs) in continuing care facilities.

113

## 114 **Methods**

115

### 116 *Setting*

117 Asymptomatic SARS-CoV-2 testing of HCWs in continuing care facilities province-wide  
118 was implemented as POCT as part of the provincial pandemic response in the province of  
119 Alberta, Canada (population 4.4 million) [8]. A retrospective review of test results was  
120 completed for testing completed from February 22, 2021 – May 2, 2021 inclusive. Facilities  
121 were assigned (based on availability, oversight, and preference) to use either the Panbio  
122 COVID-19 Antigen Rapid Test (Abbott Laboratories, Chicago, USA) or the Veritor COVID-  
123 19 Rapid Antigen Test (Becton, Dickson, and Company, Franklin Lakes, USA), herein  
124 referred to as APOCT.

125

126 Early in the pandemic, the provincial health authority had instituted a continuous masking  
127 policy for all continuing care facilities, where all staff were required to continuously wear a  
128 medical mask while at work, to be changed should the mask become soiled or wet [9].

129 Adjunctive eye protection (face shield or goggles) was advised during all episodes of patient

130 care, or continuously if there was a SARS-CoV-2 outbreak declared at the site [10]. HCWs  
131 at all facilities were required to complete a ‘fit for work’ symptom questionnaire twice per  
132 shift, and immediately leave their shift after informing their manager and arrange COVID-19  
133 testing should they develop symptoms or screen positive [11].

134

### 135 *Asymptomatic testing*

136 Each site received training for a limited number of on-site health care workers to conduct  
137 voluntary asymptomatic staff testing of site staff on a weekly basis. Training, operating  
138 procedures and medical/operational oversight were provided by Alberta Precision  
139 Laboratories (APL) POCT (for sites run by Alberta Health Services [AHS]). Sites external to  
140 AHS had vendor-driven training and medical/operational oversight was provided by the site.  
141 Staff conducting testing wore personal protective equipment (PPE) consisting of eye  
142 protection, surgical mask, gloves, and a splash-resistant gown. Sampling was done using the  
143 nasal swab provided in each test kit with testing conducted as per manufacturer’s guidelines  
144 [12, 13]. While awaiting results, staff were permitted to continue working. Staff who were  
145 symptomatic were not permitted to receive POCT asymptomatic testing and were directed to  
146 access COVID-19 testing through public health test centers. At the discretion of individual  
147 facilities, staff testing could be increased to twice weekly for non-outbreak related staff at a  
148 site where a COVID-19 outbreak had been declared (staff considered linked to the outbreak  
149 were not eligible for asymptomatic testing).

150

151 Staff receiving positive APOCT results were required to immediately isolate and obtain a  
152 confirmatory throat or nasopharyngeal swab test for SARS-CoV-2 with a real-time reverse-  
153 transcriptase polymerase chain reaction (rRT-PCR) result at an approved public health test

154 center. rRT-PCR testing was carried out at the provincial Public Health Laboratory  
155 (ProvLab) using a validated laboratory-developed assay [14] or a Health Canada approved  
156 test at an accredited laboratory. Confirmatory rRT-PCR testing was not conducted on  
157 negative SARS-CoV-2 APOCT results. Individuals with invalid APOCT results were  
158 referred for rRT-PCR evaluation. APOCT test results were not recorded in the medical chart  
159 of HCWs. Any positive APOCT results were considered presumptive positive and were not  
160 included in total provincial COVID-19 case counts, using instead the confirmatory rRT-PCR  
161 results. All HCWs with a positive APOCT result were able to obtain a follow-up rRT-PCR  
162 test.

163

#### 164 *Data extraction and analysis*

165 Data recording, organization, and provision of results were provided by Seniors Health and  
166 Continuing Care (AHS). Confirmatory rRT-PCR testing results were extracted from the  
167 ProvLab laboratory information system. Data were tabulated in Microsoft Excel.  
168 Proportional comparisons were done using a two-sample proportions z-test. Continuous  
169 variables were compared using Mann-Whitney tests while categorical variables were  
170 compared using Chi-square or Fisher's exact tests. Significance was set at  $p < 0.05$ .  
171 Confidence intervals were calculated using Wilson's method. Statistical analysis was  
172 conducted using StatPlus (AnalystSoft Inc, Alexandria, USA).

173

#### 174 **Results**

175

176 Over the 10-week period, 369/466 (79.18%) provincial continuing care sites participated in  
177 the asymptomatic screening program (Table 1). During the study period, 71,847 APOCT

178 were conducted (mean 7,184.7 tests per week; range 615-11648; 17,689 on the Veritor and  
179 54,158 on the Abbott Panbio) (Table 2). A total of 87 (0.12%) APOCT were positive, of  
180 which 39 (44.83%) were confirmed to be true positives using rRT-PCR (time duration  
181 between APOCT and rRT-PCR confirmation not available). The APOCT positivity rate did  
182 not differ significantly across the ten-week period (Table 1;  $p=0.35$ ).

183

184 Compared to the Panbio, the false detection rate was significantly higher using the Veritor  
185 (76.6%, 95% confidence interval (CI) 62.8-86.4% vs 30.0%, 95%CI 18.1-45.4%;  $p<0.0001$ )  
186 (Table 2). The PPV was significantly higher with the Panbio test (70%, 95%CI 54.6-81.9%  
187 vs 23.4%, 95%CI 13.6-37.2%;  $p<0.0001$ ).

188

189 During this time, a total of 66,338 cases of COVID-19 were diagnosed in Alberta (prevalence  
190 of 1.5%) with an average rRT-PCR positivity rate (for all specimens tested) of 7.2% (median  
191 6.3%; range 3.8-13.6%) [15]. During the study period, a total of 32 outbreaks were declared  
192 in continuing care facilities across the province (one in March 2021, 29 in April 2021, and  
193 two in May 2021). HCWs in continuing care facilities were offered mRNA COVID-19  
194 vaccines starting December 16, 2020 alongside the residents in these facilities (dosing  
195 between first doses being four and six weeks for residents and HCWs respectively). The  
196 proportion of all HCWs working in Alberta continuing care facilities who had received one  
197 dose of COVID-19 vaccine as of February 1 and May 2, 2021 was 1.1 and 69.9%  
198 respectively. The proportion having received two doses of vaccine by these dates was 16.0  
199 and 83.6% respectively. The demographics and proportions of vaccinated HCWs tested were  
200 not available, as neither were the follow-up rRT-PCR testing results of 87 individuals with  
201 invalid APOCT results.

202



203 **Discussion**

204 Despite great emphasis on the use of APOCT as a tool to combat the COVID-19 pandemic,  
205 expansion of APOCT for asymptomatic testing has been met with hesitation due to their  
206 limited PPV, especially in settings of low disease prevalence [16]. This study confirms and  
207 quantitates these concerns, demonstrating in a large-scale implementation of asymptomatic  
208 screening in continuing care HCWs, that APOCT have a low overall PPV (44.83%) and a  
209 high proportion of false positives (55.17%).

210

211 Similar performance concerns related to APOCT have been raised by a number of studies. A  
212 recent Cochrane Database systematic review reported the overall sensitivity (Sn) and  
213 specificity (Sp) of APOCT in symptomatic disease to be 72.0 and 99.5% (twenty-seven  
214 studies combined) and asymptomatic disease to be 58.1% and 98.9% respectively (twelve  
215 studies combined) [2]. Applying this to the provincial prevalence of disease we observed  
216 during the study period (1.5%), indicates our findings are consistent, with an expected PPV  
217 for APOCT around 44.6%. Several studies have reported a PPV as low as 33.3% [17, 18].

218

219 Many reports of asymptomatic SARS-CoV-2 testing campaigns using either APOCT or rRT-  
220 PCR tests have demonstrated low test positivity rates, suggesting high volume testing of  
221 asymptomatic individuals is of low yield [19-22]. Another Canadian study evaluating  
222 universal APOCT screening of HCWs in continuing care also found a similar APOCT  
223 positivity rate of 0.16% [23]. The prevalence of positive results in our cohort was similar at  
224 0.12%, however the true prevalence of disease in our cohort is much less if true positives are  
225 accounted for (0.05%). Therefore, when considering the true positivity rate, the yield of  
226 asymptomatic screening programs is poor.

227

228 The Veritor displayed both a lower PPV and a higher proportion of false positive tests  
229 compared to the Panbio. Both tests were initially authorised by the FDA and Health Canada  
230 for the diagnosis of COVID-19 within the first five (Veritor) to seven (Panbio) days of  
231 COVID-19 symptom onset [16]. Our findings are consistent with the literature,  
232 demonstrating the PPVs for the Veritor in asymptomatic individuals ranging from 24.9-  
233 50.1% (with disease prevalence of 0.5-1.5%) [24] and that of the Panbio to be 28.0-54.0%,  
234 using prevalence estimates of 0.5-1.5% [24-26]. Thus, the Panbio would be preferred over  
235 the Veritor for asymptomatic screening of COVID-19.

236

237 The impact of a false positive result can lead to considerable burden and distress on both  
238 individuals and the health care system. False positive test results in HCWs and others can  
239 lead to loss of income due to the need to isolate, collateral effects to close contacts, and also  
240 psychological damage due to misdiagnosis, stigma and fear of infecting others (especially  
241 loved ones who could have poor outcomes) [27]. In health care settings, the need for  
242 isolation in response to a false positive result can lead to staff shortages, adding further stress  
243 on other employees and patients. False positive APOCT results in acute care settings have  
244 resulted in unnecessary cancellation or postponement of treatment/procedures, and also risks  
245 that individual possibly being exposed to SARS-CoV-2 if moved into a COVID-19 treatment  
246 unit based on the APOCT result [28]. Thus, we strongly recommend proper education about  
247 the meaning of APOCT results, and ensuring processes are in place for timely confirmation  
248 with rRT-PCR if APOCT is implemented.

249

250 The setup of asymptomatic testing programs using APOCT requires considerable input of  
251 resources and logistical organization. To ensure the utmost quality of testing, APOCT should  
252 undergo appropriate test verification, creation of standard operating procedures and training  
253 programmes, and include appropriate medical and operational oversight through an  
254 accredited laboratory when implementing the associated POCT program [29]. Information  
255 technology specialists are generally required to establish reporting systems so that results can  
256 be accurately captured to facilitate public health reporting, disease notification, and contact  
257 tracing. Furthermore, ongoing oversight to address reporting errors, test distribution, and  
258 ongoing test validation must be built into the APOCT infrastructure [30]. The impact of false  
259 positive results, alongside these important operational considerations must be accounted for  
260 when deciding on the benefit of an APOCT screening program.

261

262 The principal limitation of this study is that only positive APOCT tests were confirmed by  
263 rRT-PCR, and thus no other test parameters other than a PPV could be calculated. The data  
264 however, still confirms in a large asymptomatic HCW population, that APOCT has a low  
265 PPV. The major strengths of this study lie in the large number of tests performed,  
266 participating sites, and inclusion of two different APOCT platforms.

267

268 The utility of screening asymptomatic individuals with COVID-19 APOCT is best  
269 determined by weighing the costs and benefits specific to each setting. With widespread  
270 vaccination increasing and disease prevalence falling, fewer positive test results are likely to  
271 be found among asymptomatic persons in the coming months (with a large proportion of  
272 them being false-positives), leading such endeavors to be quite costly from a materials and  
273 human resources perspectives for most health care systems. Therefore, it is important to

274 reconsider the value and effectiveness of asymptomatic APOCT COVID-19 programs over

275 the long term, especially in the context of increasing population immunity.

276

277 **Declarations**

278

279 *Ethics approval*

280 Presentation of the data contained in this report has been approved by the Human Research

281 Ethics Board at the University of Alberta (study identifier Pro00110831).

282

283 *Conflicts of interest*

284 None of the authors have any conflicts of interests with respect to this manuscript to declare.

285

286 *Funding*

287 This work did not receive any specific grant from funding agencies in the public, commercial,

288 or not-for-profit sectors. Tests were purchased by the government of Canada and distributed

289 to provinces to aid in the COVID-19 response. All other resources used internal funds.

290

291 *Acknowledgements*

292 We would like to thank the Alberta Precision Laboratories POCT staff for their support to the

293 Panbio POCT program who developed and supported designated continuing care facilities.

294 We would also like to thank the staff within the Provincial Seniors Health program who

295 developed the program parameters and operationalised the program (Sandra Gugins and

296 Sharon Leontowicz), and participating Continuing Care sites, staff responsible for the

297 asymptomatic testing programs and those staff who participated in screening.

298

299 *CRedit Author Statement*

300 Jamil N Kanji – formal analysis, data curation, writing – original draft, writing – review and

301 editing, visualization

302 Dustin Proctor – validation, writing – original draft, writing – review and editing  
303 William Stokes – conceptualization, methodology, validation, investigation, resources,  
304 project administration, writing – original draft, writing – review and editing  
305 Byron Berenger – conceptualization, validation, resources, writing – original draft, writing –  
306 review and editing  
307 James Silvius - conceptualization, validation, resources, project administration, writing –  
308 review and editing  
309 Graham Tipples - conceptualization, validation, resources, project administration, writing –  
310 review and editing  
311 Mark A Joffe - conceptualization, validation, resources, project administration, writing –  
312 review and editing  
313 Allison Venner – conceptualization, methodology, validation, investigation, resources,  
314 project administration, writing – original draft, writing – review and editing, supervision  
315  
316 **Availability of data and materials**  
317 The datasets used and/or analysed during the current study are available from the  
318 corresponding author on reasonable request.  
319  
320  
321

322 **References**

323

324 [1] Government of Canada, Priority strategies to optimize testing and screening for COVID-  
325 19 in Canada: Report. <[https://www.canada.ca/en/health-canada/services/drugs-health-](https://www.canada.ca/en/health-canada/services/drugs-health-products/covid19-industry/medical-devices/testing-screening-advisory-panel/reports-summaries/priority-strategies.html)  
326 [products/covid19-industry/medical-devices/testing-screening-advisory-panel/reports-](https://www.canada.ca/en/health-canada/services/drugs-health-products/covid19-industry/medical-devices/testing-screening-advisory-panel/reports-summaries/priority-strategies.html)  
327 [summaries/priority-strategies.html](https://www.canada.ca/en/health-canada/services/drugs-health-products/covid19-industry/medical-devices/testing-screening-advisory-panel/reports-summaries/priority-strategies.html)>, (accessed May 17, 2021.).

328 [2] J. Dinnes, J.J. Deeks, S. Berhane, M. Taylor, A. Adriano, C. Davenport, S. Dittrich, D.  
329 Emperador, Y. Takwoingi, J. Cunningham, S. Beese, J. Domen, J. Dretzke, L. Ferrante di  
330 Ruffano, I.M. Harris, M.J. Price, S. Taylor-Phillips, L. Hooft, M.M. Leeflang, M.D. McInnes,  
331 R. Spijker, A. Van den Bruel, C.-D.T.A.G. Cochrane, Rapid, point-of-care antigen and  
332 molecular-based tests for diagnosis of SARS-CoV-2 infection, *Cochrane Database Syst Rev*  
333 3(3) (2021) CD013705-CD013705.

334 [3] A. Crozier, S. Rajan, I. Buchan, M. McKee, Put to the test: use of rapid testing  
335 technologies for covid-19, *BMJ* 372 (2021) n208.

336 [4] M. Liu, R.K. Arora, M. Krajden, Rapid antigen tests for SARS-CoV-2, *Canadian Medical*  
337 *Association Journal* 193(13) (2021) E447-E447.

338 [5] Centers for Disease Control and Prevention (CDC), COVID-19 Pandemic Planning  
339 Scenarios. <<https://www.cdc.gov/coronavirus/2019-ncov/hcp/planning-scenarios.html>>,  
340 (accessed May 17, 2021.).

341 [6] K. Wu, Nevada Halts Use of Rapid Coronavirus Tests in Nursing Homes, Citing  
342 Inaccuracies, *New York Times*.

343 [7] S. Armstrong, Covid-19: Tests on students are highly inaccurate, early findings show,  
344 *BMJ* 371 (2020) m4941.

345 [8] Government of Alberta, Population statistics. <[https://www.alberta.ca/population-](https://www.alberta.ca/population-statistics.aspx)  
346 [statistics.aspx](https://www.alberta.ca/population-statistics.aspx)>, (accessed May 10, 2021.).

- 347 [9] Alberta Health Services, Directive: Use of masks during COVID-19.  
348 <https://extranet.ahsnet.ca/teams/policydocuments/1/clp-ahs-use-of-masks-hcs-267.pdf>,  
349 (accessed May 10, 2021.).
- 350 [10] Alberta Health Services, Continuing Care - Personal Protective Equipment (PPE) -  
351 Frequently Asked Questions. [https://www.albertahealthservices.ca/assets/info/ppih/if-ppih-](https://www.albertahealthservices.ca/assets/info/ppih/if-ppih-covid-19-ppe-faq-continuing-care.pdf)  
352 [covid-19-ppe-faq-continuing-care.pdf](https://www.albertahealthservices.ca/assets/info/ppih/if-ppih-covid-19-ppe-faq-continuing-care.pdf)>, (accessed May 10, 2021.).
- 353 [11] Alberta Health Services, Fit For Work: COVID-19.  
354 <https://www.albertahealthservices.ca/topics/Page17076.aspx>>, (accessed May 15, 2021.).
- 355 [12] Abbott, Panbio COVID-19 Ag Rapid Test Device (Nasal). [https://dam.abbott.com/en-](https://dam.abbott.com/en-gb/panbio/120007883-v1-Panbio-COVID-19-Ag-Nasal-AsymptomaticSe.pdf)  
356 [gb/panbio/120007883-v1-Panbio-COVID-19-Ag-Nasal-AsymptomaticSe.pdf](https://dam.abbott.com/en-gb/panbio/120007883-v1-Panbio-COVID-19-Ag-Nasal-AsymptomaticSe.pdf)>, (accessed  
357 May 17, 2021.).
- 358 [13] D.a.C. Beckton, Veritor System for Rapid Detection of SARS-CoV-2.  
359 <https://bdveritor.bd.com/content/dam/bdveritor/pdfs/BD-Veritor-IFU.pdf>>, (accessed May  
360 17, 2021.).
- 361 [14] K. Pabbaraju, A.A. Wong, M. Douesnard, R. Ma, K. Gill, P. Dieu, K. Fonseca, N.  
362 Zelyas, G.A. Tipples, Development and validation of RT-PCR assays for testing for SARS-  
363 CoV-2, Official Journal of the Association of Medical Microbiology and Infectious Disease  
364 Canada 6(1) (2021) 16-22.
- 365 [15] Government of Alberta, Cases in Alberta. [https://www.alberta.ca/covid-19-alberta-](https://www.alberta.ca/covid-19-alberta-data.aspx)  
366 [data.aspx](https://www.alberta.ca/covid-19-alberta-data.aspx)>, May 17, 2021).
- 367 [16] R.W. Peeling, P.L. Olliaro, D.I. Boeras, N. Fongwen, Scaling up COVID-19 rapid  
368 antigen tests: promises and challenges, The Lancet Infectious Diseases.
- 369 [17] I.W. Pray, L. Ford, D. Cole, C. Lee, J.P. Bigouette, G.R. Abedi, D. Bushman, M.J.  
370 Delahoy, D. Currie, B. Cherney, M. Kirby, G. Fajardo, M. Caudill, K. Langolf, J. Kahrs, P.  
371 Kelly, C. Pitts, A. Lim, N. Aulik, A. Tamin, J.L. Harcourt, K. Queen, J. Zhang, B. Whitaker,



- 372 H. Browne, M. Medrzycki, P. Shewmaker, J. Folster, B. Bankamp, M.D. Bowen, N.J.  
373 Thornburg, K. Goffard, B. Limbago, A. Bateman, J.E. Tate, D. Gieryn, H.L. Kirking, R.  
374 Westergaard, M. Killerby, Performance of an Antigen-Based Test for Asymptomatic and  
375 Symptomatic SARS-CoV-2 Testing at Two University Campuses - Wisconsin, September-  
376 October 2020, *MMWR Morb Mortal Wkly Rep* 69(5152) (2021) 1642-1647.
- 377 [18] M. Masiá, M. Fernández-González, M. Sánchez, M. Carvajal, J.A. García, N. Gonzalo-  
378 Jiménez, V. Ortiz de la Tabla, V. Agulló, I. Candela, J. Guijarro, J.A. Gutiérrez, C. de  
379 Gregorio, F. Gutiérrez, Nasopharyngeal Panbio COVID-19 Antigen Performed at Point-of-  
380 Care Has a High Sensitivity in Symptomatic and Asymptomatic Patients With Higher Risk  
381 for Transmission and Older Age, *Open Forum Infectious Diseases* 8(3) (2021).
- 382 [19] P. Ravani, L. Saxinger, U. Chandran, K. Fonseca, S. Murphy, E. Lang, L. McDougall, B.  
383 Manns, COVID-19 screening of asymptomatic patients admitted through emergency  
384 departments in Alberta: a prospective quality-improvement study, *CMAJ Open* 8(4) (2020)  
385 E887-e894.
- 386 [20] J. Ferguson, S. Dunn, A. Best, J. Mirza, B. Percival, M. Mayhew, O. Megram, F.  
387 Ashford, T. White, E. Moles-Garcia, L. Crawford, T. Plant, A. Bosworth, M. Kidd, A.  
388 Richter, J. Deeks, A. McNally, Validation testing to determine the sensitivity of lateral flow  
389 testing for asymptomatic SARS-CoV-2 detection in low prevalence settings: Testing  
390 frequency and public health messaging is key, *PLoS Biol* 19(4) (2021) e3001216.
- 391 [21] J. Olalla, A.M. Correa, Martín-Escalante, M D, M.L. Hortas, M.J. Martín-Sendarrubias,  
392 V. Fuentes, Sena, G, J. García-Alegría, t.R. Group, Search for asymptomatic carriers of  
393 SARS-CoV-2 in healthcare workers during the pandemic: a Spanish experience, *QJM: An*  
394 *International Journal of Medicine* 113(11) (2020) 794-798.
- 395 [22] S. Cao, Y. Gan, C. Wang, M. Bachmann, S. Wei, J. Gong, Y. Huang, T. Wang, L. Li, K.  
396 Lu, H. Jiang, Y. Gong, H. Xu, X. Shen, Q. Tian, C. Lv, F. Song, X. Yin, Z. Lu, Post-

- 397 lockdown SARS-CoV-2 nucleic acid screening in nearly ten million residents of Wuhan,  
398 China, *Nature Communications* 11(1) (2020) 5917.
- 399 [23] S.N. Kain D, Allen V, Evans GA, Hopkins J, Kouyoumdjian FG, McGeer A, Mubareka  
400 S, Patel SN, Rochon PA, Schwartz B, Juni P, Johnstone J, Routine Asymptomatic SARS-  
401 CoV-2 Screen Testing of Ontario Long-Term Care Staff After COVID-19 Vaccination.  
402 <<https://doi.org/10.47326/ocsat.2021.02.15.1.0>>, 2021 (accessed May 14, 2021.).
- 403 [24] G. Caruana, A. Croxatto, E. Kampouri, A. Kritikos, O. Opota, M. Foerster, R. Brouillet,  
404 L. Senn, R. Lienhard, A. Egli, G. Pantaleo, P.N. Carron, G. Greub, Implementing SARS-  
405 CoV-2 Rapid Antigen Testing in the Emergency Ward of a Swiss University Hospital: The  
406 INCREASE Study, *Microorganisms* 9(4) (2021).
- 407 [25] I. Torres, S. Poujois, E. Albert, J. Colomina, D. Navarro, Evaluation of a rapid antigen  
408 test (Panbio™ COVID-19 Ag rapid test device) for SARS-CoV-2 detection in asymptomatic  
409 close contacts of COVID-19 patients, *Clin Microbiol Infect* 27(4) (2021) 636.e1-636.e4.
- 410 [26] B. Baro, P. Rodo, D. Ouchi, A.E. Bordoy, E.N. Saya Amaro, S.V. Salsench, S. Molinos,  
411 A. Alemany, M. Ubals, M. Corbacho-Monné, P. Millat-Martinez, M. Marks, B. Clotet, N.  
412 Prat, O. Estrada, M. Vilar, J. Ara, M. Vall-Mayans, G.B. C, Q. Bassat, I. Blanco, O. Mitjà,  
413 Performance characteristics of five antigen-detecting rapid diagnostic test (Ag-RDT) for  
414 SARS-CoV-2 asymptomatic infection: a head-to-head benchmark comparison, *J Infect* 82(6)  
415 (2021) 269-275.
- 416 [27] E. Surkova, V. Nikolayevskyy, F. Drobniewski, False-positive COVID-19 results:  
417 hidden problems and costs, *The Lancet Respiratory Medicine* 8(12) (2020) 1167-1168.
- 418 [28] B. Healy, A. Khan, H. Metezai, I. Blyth, H. Asad, The impact of false positive COVID-  
419 19 results in an area of low prevalence, *Clin Med (Lond)* 21(1) (2021) e54-e56.

- 420 [29] P.M. Yip, A.A. Venner, J. Shea, A. Fuezery, Y. Huang, L. Massicotte, N. Tetreault, C.  
421 Tomalty, J.L.V. Shaw, Point-of-care testing: A position statement from the Canadian Society  
422 of Clinical Chemists, *Clin Biochem* 53 (2018) 156-159.
- 423 [30] E.H. Kaplan, H.P. Forman, Logistics of Aggressive Community Screening for  
424 Coronavirus 2019, *JAMA Health Forum* 1(5) (2020) e200565-e200565.
- 425
- 426

427 **Table 1.** Weekly APOCT for asymptomatic staff at continuing care sites across Alberta,  
 428 Canada.

| Week               | Number of reporting sites | Number of tests performed | Positive APOCTs (%) <sup>a</sup> | Invalid APOCTs (%) | Number confirmed by rRT-PCR (%) |
|--------------------|---------------------------|---------------------------|----------------------------------|--------------------|---------------------------------|
| Feb 22-28, 2021    | 11                        | 615                       | 1 (0.16)                         | 4 (0.65)           | 0                               |
| Mar 1-7, 2021      | 115                       | 2,446                     | 0                                | 4 (0.16)           | 0                               |
| Mar 8-14, 2021     | 188                       | 4,374                     | 3 (0.07)                         | 16 (0.37)          | 0                               |
| Mar 15-21, 2021    | 309                       | 8,680                     | 8 (0.09)                         | 29 (0.33)          | 1 (12.50)                       |
| Mar 22-28, 2021    | 293                       | 7,603                     | 6 (0.08)                         | 4 (0.05)           | 1 (16.67)                       |
| Mar 29-Apr 4, 2021 | 311                       | 8,029                     | 9 (0.11)                         | 13 (0.16)          | 5 (55.56)                       |
| Apr 5-11, 2021     | 317                       | 9,599                     | 12 (0.13)                        | 3 (0.03)           | 8 (66.67)                       |
| Apr 12-18, 2021    | 325                       | 9,312                     | 15 (0.16)                        | 4 (0.04)           | 6 (40.00)                       |
| Apr 19-25, 2021    | 321                       | 9,541                     | 17 (0.18)                        | 6 (0.06)           | 10 (58.82)                      |
| Apr 26-May 2, 2021 | 369                       | 11,648                    | 16 (0.14)                        | 4 (0.03)           | 8 (50.00)                       |
| Total              | 369                       | 71,847                    | 87 (0.12)                        | 87 (0.12)          | 39 (44.83)                      |

429 Abbreviations: Apr – April; Feb – February; Mar – March; rRT-PCR – real time reverse  
 430 transcriptase polymerase chain reaction.

431 <sup>a</sup>Change in APOCT positivity across the ten weeks is not significant (Pearson’s Chi-square,  
 432 p=0.35).

433

434 **Table 2.** APOCT and rRT-PCR confirmatory results for asymptomatic continuing care  
435 health care workers in Alberta, Canada.

| Item                                     | BD Veritor                  | Panbio                      | Total (%)      |
|------------------------------------------|-----------------------------|-----------------------------|----------------|
| Total APOCTs                             | 17,689                      | 54,158                      | 71,847         |
| Positive APOCTs (%)                      | 47 (0.27)                   | 40 (0.07)                   | 87 (0.12)      |
| Negative APOCTs (%)                      | n/a                         | n/a                         | 71,673 (99.76) |
| Invalid APOCTs (%)                       | n/a                         | n/a                         | 87 (0.12)      |
| Positive APOCTs confirmed by rRT-PCR (%) | 11 (0.06)                   | 28 (0.05)                   | 39 (0.05)      |
| Number of false positives (%)            | 36/47 = 76.60% <sup>a</sup> | 12/40 = 30.00% <sup>a</sup> | 48/87 = 55.17% |
| Positive predictive value (%)            | 11/47 = 23.40% <sup>a</sup> | 28/40 = 70.00% <sup>a</sup> | 39/87 = 44.83% |

436 Abbreviations: n/a – not available

437 <sup>a</sup>Comparison between BD Veritor and Abbott Panbio:  $p < 0.0001$ .

438

439

440 **STROBE CHECKLIST**

441 **Source of STROBE checklist:** [https://www.strobe-](https://www.strobe-statement.org/fileadmin/Strobe/uploads/checklists/STROBE_checklist_v4_cohort.pdf)  
 442 [statement.org/fileadmin/Strobe/uploads/checklists/STROBE\\_checklist\\_v4\\_cohort.pdf](https://www.strobe-statement.org/fileadmin/Strobe/uploads/checklists/STROBE_checklist_v4_cohort.pdf)

443

444 **Manuscript title:**

445 Multi-centre post-implementation evaluation of SARS-CoV-2 antigen-based point of care  
 446 tests used for asymptomatic screening of continuing care healthcare workers

447

| Section                  | Description                                                                                                                                                                                | Location in Manuscript                                                                     |
|--------------------------|--------------------------------------------------------------------------------------------------------------------------------------------------------------------------------------------|--------------------------------------------------------------------------------------------|
| Title and Abstract       | (a) Indicate the study’s design with a commonly used term in the title or the abstract (b) Provide in the abstract an informative and balanced summary of what was done and what was found | Title indicates study type<br><br>Abstract provides details of outbreak and interventions. |
| <b>Introduction</b>      |                                                                                                                                                                                            |                                                                                            |
| Background and rationale | Explain the scientific background and rationale for the investigation being reported                                                                                                       | Introduction – page 4-5                                                                    |
| Objectives               | State specific objectives, including any prespecified hypotheses                                                                                                                           | Last paragraph of introduction – page 5.                                                   |
| <b>Methods</b>           |                                                                                                                                                                                            |                                                                                            |
| Study design             | Present key elements of study design early in the paper                                                                                                                                    | Outlined in Methods – Page 6                                                               |
| Setting                  | Describe the setting, locations, and relevant dates, including periods of recruitment, exposure, follow-up, and data collection                                                            | Methods – Page 5-7                                                                         |
| Participants             | Give the eligibility criteria, and the sources and methods of selection of participants. Describe methods of follow-up                                                                     | Methods – Page 5 (first paragraph)                                                         |
| Variables                | Clearly define all outcomes, exposures, predictors, potential confounders, and effect modifiers. Give diagnostic criteria, if applicable                                                   | Methods – Pages 5-6                                                                        |

|                       |                                                                                                                                                                                                                                                                                           |                                                                                                                                                      |
|-----------------------|-------------------------------------------------------------------------------------------------------------------------------------------------------------------------------------------------------------------------------------------------------------------------------------------|------------------------------------------------------------------------------------------------------------------------------------------------------|
| Data sources          | For each variable of interest, give sources of data and details of methods of assessment (measurement). Describe comparability of assessment methods if there is more than one group                                                                                                      | Methods – Pages 7                                                                                                                                    |
| Bias                  | Describe any efforts to address potential sources of bias                                                                                                                                                                                                                                 | Not applicable. There are limitations outlined in the discussion.                                                                                    |
| Study size            | Explain how the study size was arrived at                                                                                                                                                                                                                                                 | As this was a retrospective review, not applicable. However, sample sizes and details of data extraction provided in Methods page 7 and Results 7-8. |
| Quantitative analysis | Explain how quantitative variables were handled in the analyses. If applicable, describe which groupings were chosen and why                                                                                                                                                              | Methods page 7.                                                                                                                                      |
| Statistical methods   | Describe all statistical methods                                                                                                                                                                                                                                                          | Methods pages 7.                                                                                                                                     |
| <b>Results</b>        |                                                                                                                                                                                                                                                                                           |                                                                                                                                                      |
| Participants          | (a) Report numbers of individuals at each stage of study—eg numbers potentially eligible, examined for eligibility, confirmed eligible, included in the study, completing follow-up, and analysed (b) Give reasons for non-participation at each stage (c) Consider use of a flow diagram | Results – Page 8                                                                                                                                     |
| Descriptive data      | (a) Give characteristics of study participants (eg demographic, clinical, social) and information on exposures and potential confounders (b) Indicate number of participants with missing data for each variable of interest (c) Summarise follow-up time (eg, average and total amount)  | Results – Pages 7-8                                                                                                                                  |
| Outcome data          | Report numbers of outcome events or summary                                                                                                                                                                                                                                               | Results pages 7-8, Table 1+2                                                                                                                         |

|                                  |                                                                                                                                                                                                                                                                                                                                                                                                         |                                              |
|----------------------------------|---------------------------------------------------------------------------------------------------------------------------------------------------------------------------------------------------------------------------------------------------------------------------------------------------------------------------------------------------------------------------------------------------------|----------------------------------------------|
|                                  | measures over time                                                                                                                                                                                                                                                                                                                                                                                      |                                              |
| Main results                     | (a) Give unadjusted estimates and, if applicable, confounder-adjusted estimates and their precision (eg, 95% confidence interval). Make clear which confounders were adjusted for and why they were included (b) Report category boundaries when continuous variables were categorized (c) If relevant, consider translating estimates of relative risk into absolute risk for a meaningful time period | Results pages 7-8, Table 1+2                 |
| Other analyses                   | Report other analyses done—eg analyses of subgroups and interactions, and sensitivity analyses                                                                                                                                                                                                                                                                                                          | Not applicable.                              |
| <b>Discussion/Interpretation</b> |                                                                                                                                                                                                                                                                                                                                                                                                         |                                              |
| Key results                      | Summarise key results with reference to study objectives                                                                                                                                                                                                                                                                                                                                                | First paragraph of Discussion.               |
| Limitations                      | Discuss limitations of the study, taking into account sources of potential bias or imprecision. Discuss both direction and magnitude of any potential bias                                                                                                                                                                                                                                              | Limitations section of Discussion (page 11). |
| Interpretation                   | Give a cautious overall interpretation of results considering objectives, limitations, multiplicity of analyses, results from similar studies, and other relevant evidence                                                                                                                                                                                                                              | Pages 9-12.                                  |
| Generalisability                 | Discuss the generalisability (external validity) of the study results                                                                                                                                                                                                                                                                                                                                   | Pages 10-11.                                 |
| <b>Other</b>                     |                                                                                                                                                                                                                                                                                                                                                                                                         |                                              |
| Funding                          | Give the source of funding and the role of the funders for the present study and, if applicable, for the original study on which the present article is based                                                                                                                                                                                                                                           | Outlined in declarations section.            |
